# Supplementary material
Source: HighWire-hosted journal article supplement (https://thorax.bmj.com/content/73/9/880)
Supplement: inline-supplementary-material-1 [file inline-supplementary-material-1.pdf]

Online supplement

**eTable 1. Participant characteristics for all patients included in the construct validation (n=68) and those who report having a carer (n=45).**

| <b>Characteristic</b>                                                        | <b>Patients<br/>(n=68)</b> | <b>Patients with a carer<br/>(n=45)</b> |
|------------------------------------------------------------------------------|----------------------------|-----------------------------------------|
| <b>Age, years</b>                                                            |                            |                                         |
| <i>Mean (SD)</i>                                                             | 66.5 (10.3)                | 68.4 (8.9)                              |
| <b>Gender, n (%)</b>                                                         |                            |                                         |
| <i>Male</i>                                                                  | 42 (61.8)                  | 27 (60.0)                               |
| <i>Female</i>                                                                | 26 (38.2)                  | 18 (40.0)                               |
| <b>Location, n (%)</b>                                                       |                            |                                         |
| <i>North West England site 1</i>                                             | 39 (57.4)                  | 23 (51.1)                               |
| <i>South England</i>                                                         | 17 (25.0)                  | 12 (26.7)                               |
| <i>East England</i>                                                          | 9 (13.2)                   | 7 (15.6)                                |
| <i>North West England site 2</i>                                             | 3 (4.4)                    | 3 (6.7)                                 |
| <b>Type of ILD, n (%)</b>                                                    |                            |                                         |
| <i>IPF</i>                                                                   | 38 (55.9)                  | 25 (55.6)                               |
| <b>Time since diagnosis, months</b>                                          |                            |                                         |
| <i>Mean (SD)</i>                                                             | 40.4 (53.7)                | 37.1 (48.2)                             |
| <b>Oxygen therapy, n (%)</b>                                                 |                            |                                         |
| <i>Yes</i>                                                                   | 24 (35.3)                  | 20 (44.4)                               |
| <i>No</i>                                                                    | 41 (60.3)                  | 23 (51.1)                               |
| <i>Missing</i>                                                               | 3 (4.4)                    | 2 (4.4)                                 |
| <b>MRC breathlessness scale, n (%)</b>                                       |                            |                                         |
| <i>1 Not troubled by breathlessness</i>                                      | 3 (4.4)                    | 1 (2.2)                                 |
| <i>2</i>                                                                     | 9 (13.2)                   | 6 (13.3)                                |
| <i>3</i>                                                                     | 21 (30.9)                  | 12 (26.7)                               |
| <i>4</i>                                                                     | 25 (36.8)                  | 16 (35.6)                               |
| <i>5 Too breathless to leave the house/breathlessness on getting dressed</i> | 8 (11.8)                   | 8 (17.8)                                |
| <i>Missing</i>                                                               | 2 (2.9)                    | 2 (4.4)                                 |
| <b>Carer, n (%)</b>                                                          |                            |                                         |

|                         |           |           |
|-------------------------|-----------|-----------|
| <i>Spouse</i>           | 37 (54.4) | 37 (82.2) |
| <i>Son or Daughter</i>  | 5 (7.4)   | 5 (11.1)  |
| <i>Other relative</i>   | 2 (2.9)   | 2 (4.4)   |
| <i>Friend/Neighbour</i> | 1 (1.5)   | 1 (2.2)   |
| <i>No carer</i>         | 20 (29.4) | 0 (0.0)   |
| <i>Missing</i>          | 3 (4.4)   | 0 (0.0)   |

**eTable 2. Summary of responses to the Caregiver Strain Index (n= 27) and Carers' Support Needs Assessment Tool (n=29).**

| <b>Carer Strain Inventory</b><br>"I am going to read a list of things that other people have found to be difficult. Would you tell me whether any of these apply to you?" |                |               | <b>Carers' Support Needs Assessment Tool</b><br>"Do you need more support with..."<br>Responses: A = No; B = A little more; C= Quite a bit more; D = Very much more; E = Missing |           |           |          |          |          |
|---------------------------------------------------------------------------------------------------------------------------------------------------------------------------|----------------|---------------|----------------------------------------------------------------------------------------------------------------------------------------------------------------------------------|-----------|-----------|----------|----------|----------|
|                                                                                                                                                                           | <b>Yes (%)</b> | <b>No (%)</b> |                                                                                                                                                                                  | <b>A</b>  | <b>B</b>  | <b>C</b> | <b>D</b> | <b>E</b> |
| Sleep is disturbed                                                                                                                                                        | 14 (51.9)      | 13 (48.2)     | ...understanding your relative's illness?                                                                                                                                        | 14 (48.3) | 9 (31.0)  | 5 (17.2) | 1 (3.5)  | 0 (0.0)  |
| It is inconvenient                                                                                                                                                        | 3 (11.1)       | 24 (88.9)     | ...having time for yourself in the day?                                                                                                                                          | 18 (62.1) | 5 (17.2)  | 5 (17.2) | 1 (3.5)  | 0 (0.0)  |
| It is a physical strain                                                                                                                                                   | 5 (18.5)       | 22 (81.5)     | ...managing your relative's symptoms, including giving medicines?                                                                                                                | 22 (75.9) | 4 (13.8)  | 2 (6.9)  | 1 (3.5)  | 0 (0.0)  |
| It is confining                                                                                                                                                           | 12 (46.2)      | 14 (53.9)     | ...your financial, legal or work issues?                                                                                                                                         | 20 (69.0) | 5 (17.2)  | 2 (6.9)  | 1 (3.5)  | 1 (3.5)  |
| There have been family adjustments                                                                                                                                        | 7 (25.9)       | 20 (74.1)     | ...providing personal care for your relative?                                                                                                                                    | 23 (79.3) | 2 ( 6.9)  | 3 (10.3) | 0 (0.0)  | 1 (3.5)  |
| There have been changes in personal plans                                                                                                                                 | 16 (64.0)      | 9 (36.0)      | ...dealing with your feelings and worries?                                                                                                                                       | 14 (48.3) | 12 (41.4) | 3 (10.3) | 0 (0.0)  | 0 (0.0)  |
| There have been emotional adjustments                                                                                                                                     | 8 (29.6)       | 19 (70.4)     | ...knowing who to contact if you are concerned about your relative?                                                                                                              | 15 (51.7) | 6 (20.7)  | 5 (17.2) | 2 (6.9)  | 1 (3.5)  |
| Some behaviour is upsetting                                                                                                                                               | 8 (29.6)       | 19 (70.4)     | ...looking after your own health?                                                                                                                                                | 20 (69.0) | 5 (17.2)  | 4 (13.8) | 0 (0.0)  | 0 (0.0)  |

|                                                   |           |           |                                                                        |           |           |          |          |         |
|---------------------------------------------------|-----------|-----------|------------------------------------------------------------------------|-----------|-----------|----------|----------|---------|
| It is upsetting to find [patient] has changed ... | 16 (59.3) | 11 (40.7) | ...equipment to help care for your relative?                           | 21 (72.4) | 6 (20.7)  | 2 (6.9)  | 0 (0.0)  | 0 (0.0) |
| There have been work adjustments                  | 8 (29.6)  | 19 (70.4) | ...your beliefs or spiritual concerns?                                 | 26 (89.7) | 0 (0.0)   | 2 (6.9)  | 0 (0.0)  | 1 (3.5) |
| It is a financial strain                          | 8 (29.6)  | 19 (70.4) | ...talking with your relative about his or her illness?                | 19 (65.5) | 4 (13.8)  | 5 (17.2) | 1 (3.5)  | 0 (0.0) |
| Feeling completely overwhelmed                    | 13 (48.2) | 14 (51.9) | ...practical help in the home?                                         | 18 (62.1) | 5 (17.2)  | 5 (17.2) | 1 (3.5)  | 0 (0.0) |
|                                                   |           |           | ...knowing what to expect in the future when caring for your relative? | 6 (20.7)  | 13 (44.8) | 4 (13.8) | 6 (20.7) | 0 (0.0) |
|                                                   |           |           | ...getting a break from caring overnight?                              | 25 (86.2) | 2 (6.9)   | 1 (3.5)  | 1 (3.5)  | 0 (0.0) |
